# Supplementary material for: Airway Delivery of Hydrogel-Encapsulated Niclosamide for the Treatment of Inflammatory Airway Disease
Source: MDPI journal article supplement (doi:10.3390/ijms23031085), 2022-01-19
Supplement: s1 [file s1]

A

mouse control

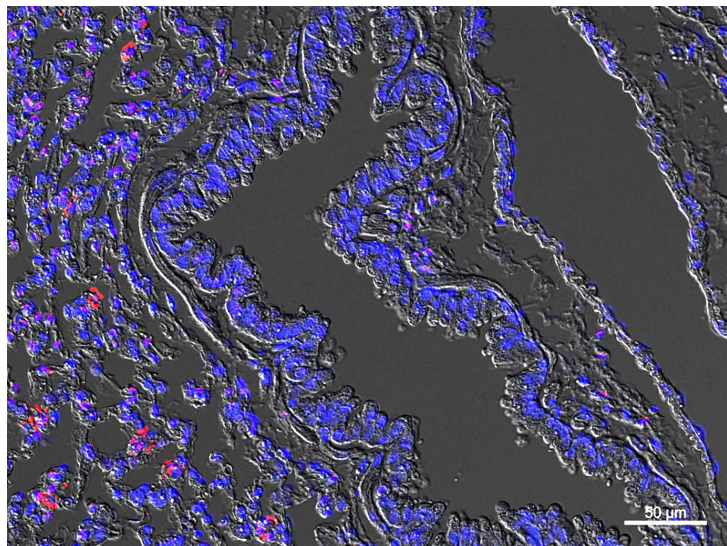

mouse OVA

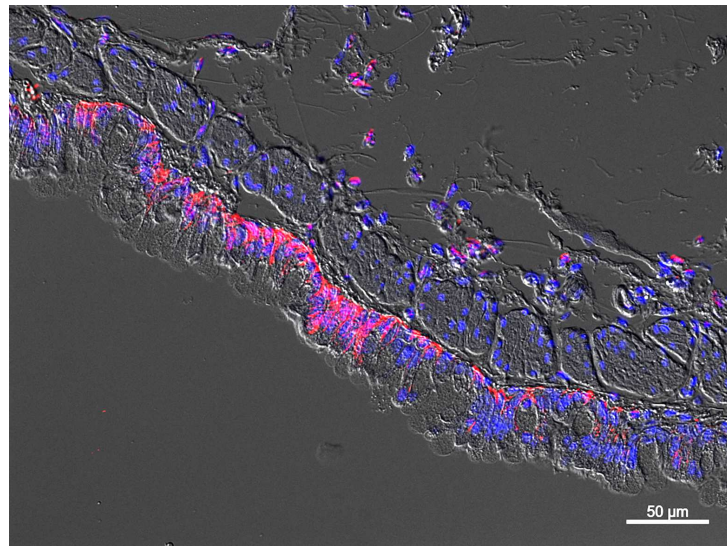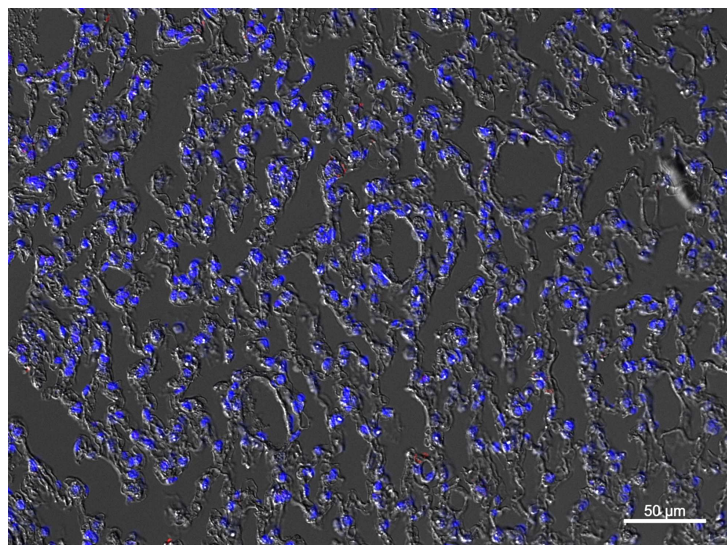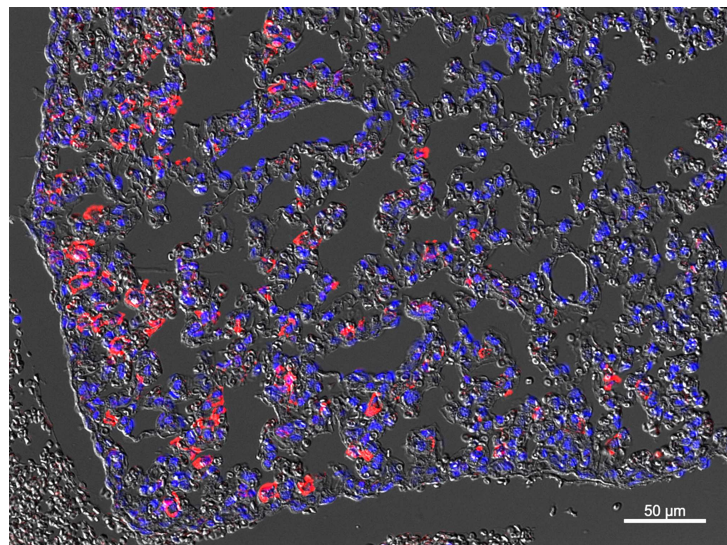

B

human asthma

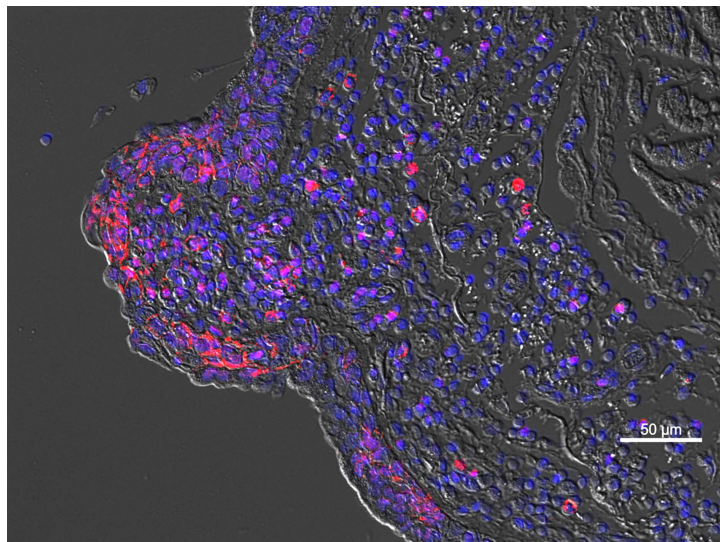

human asthma

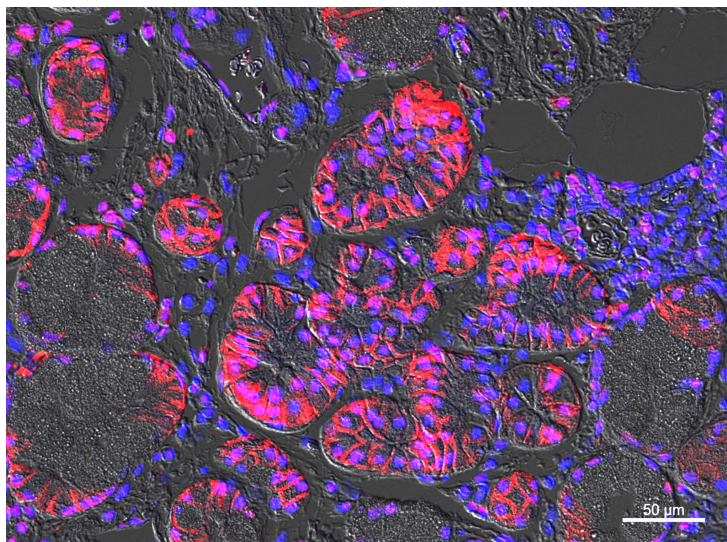

**Supplementary Figure 1.** *Upregulation of CD44 expression in asthmatic lungs of mouse and human.* A) Upregulation of CD44 in the basolateral membrane of the airway epithelium and in alveolar epithelial cells of ovalbumin-sensitized mice. B) Pronounced expression of CD44 in submucosal glands and lung tissue of asthmatic patient. Bar = 50 μm.
